# Supplementary material for: Whole-genome sequencing of eight goat populations for the detection of selection signatures underlying production and adaptive traits
Source: PubMed Central journal article supplement (PMC5150979; doi:10.1038/srep38932), 2016-12-12
Supplement: srep38932-s1.pdf [file srep38932-s1.pdf]

## Supplementary Information

### Whole-genome sequencing of eight goat populations for the detection of selection signatures underlying production and adaptive traits

Xiaolong Wang<sup>1§</sup>, Jing Liu<sup>1§</sup>, Guangxian Zhou<sup>1</sup>, Jiazhong Guo<sup>2</sup>, Hailong Yan<sup>1,3</sup>, Yiyuan Niu<sup>1</sup>, Yan Li<sup>1</sup>, Chao Yuan<sup>4</sup>, Rongqing Geng<sup>1,5</sup>, Xianyong Lan<sup>1</sup>, Xiaopeng An<sup>1</sup>, Xingui Tian<sup>6</sup>, Huangkai Zhou<sup>7</sup>, Jiuzhou Song<sup>8</sup>, Yu Jiang<sup>1</sup>, Yulin Chen<sup>1\*</sup>

<sup>1</sup>College of Animal Science and Technology, Northwest A&F University, Yangling, 712100 China.

<sup>2</sup>College of Animal Science and Technology, Sichuan Agricultural University, Ya'an, 625000 China.

<sup>3</sup>College of Life Science, Yulin University, Yulin, 719000 China.

<sup>4</sup>Lanzhou Institute of Husbandry and Pharmaceutical Sciences of CAAS, Lanzhou 730050 China.

<sup>5</sup>College of Pharmacy, Yancheng Teachers University, Yancheng, 224051 China.

<sup>6</sup>Guizhou University, Guiyang, 550000 China.

<sup>7</sup>Guangzhou Gene de-novo Biotechnology Co. Ltd. Guangzhou, 510000 China.

<sup>8</sup>Department of Animal and Avian Sciences, University of Maryland, College Park, Maryland 20742 USA.

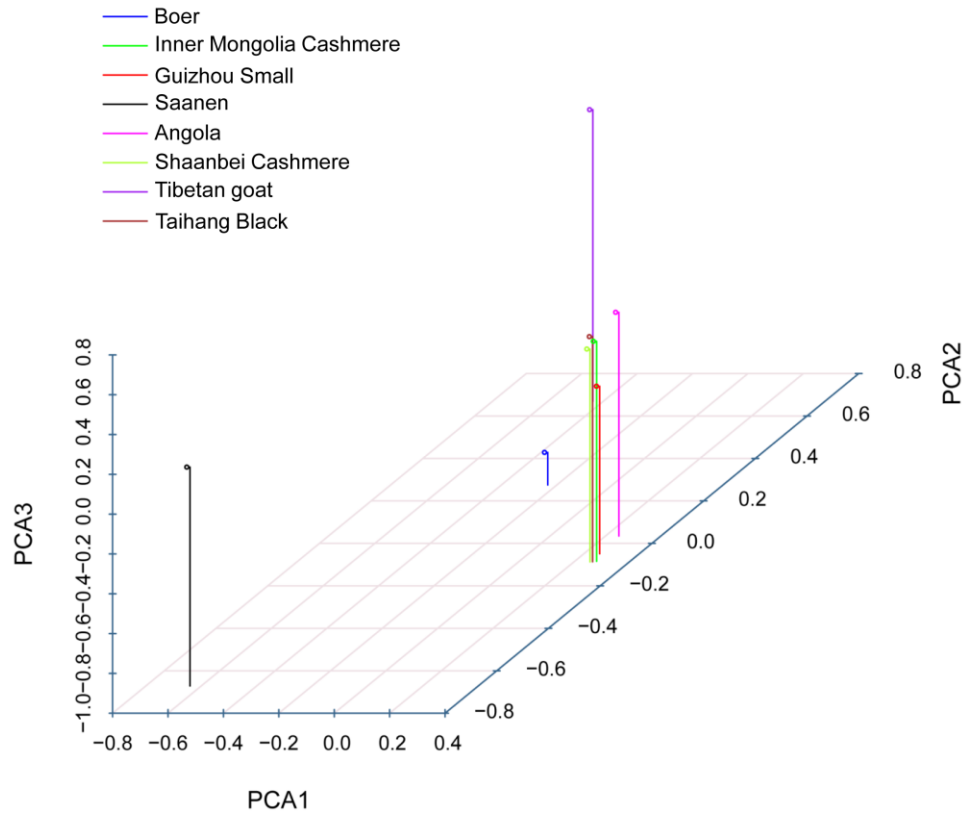

**Supplementary Fig. S1** Principal components analysis (PCA) of eight goat breeds using components PC1, PC2, and PC3.

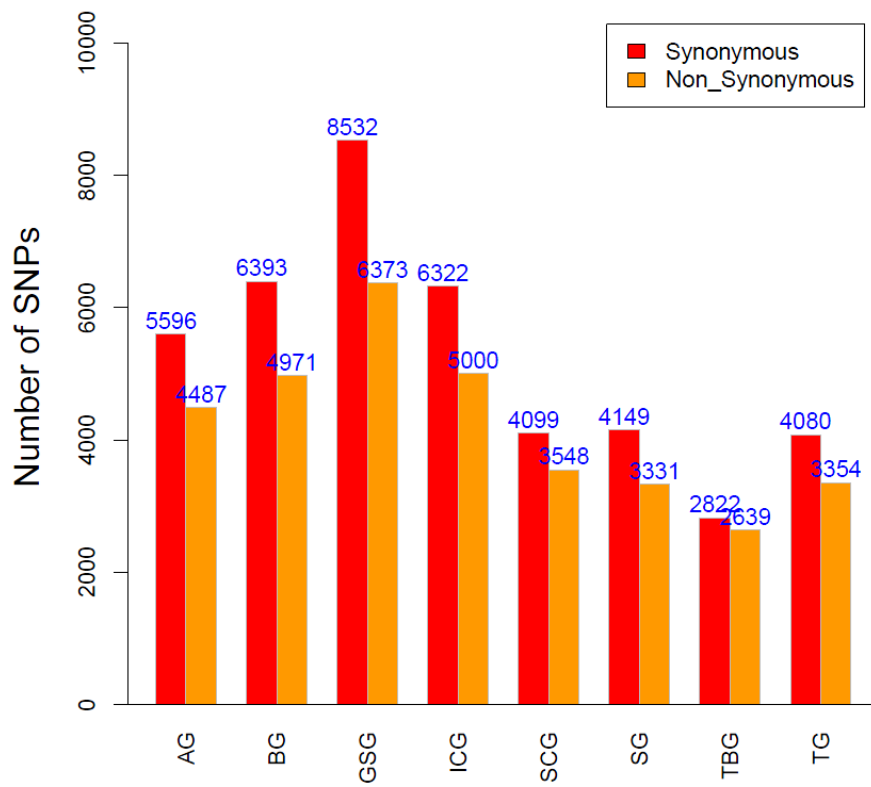

**Supplementary Fig. S2** The number of synonymous and non-synonymous mutations in each goat breed. Angora (AG), Boer (BG), Guizhou Small (GSG), Inner Mongolia Cashmere (ICG), Shaanbei Cashmere (SCG), Saanen (SG), Taihang Black (TBG), Tibetan (TG).

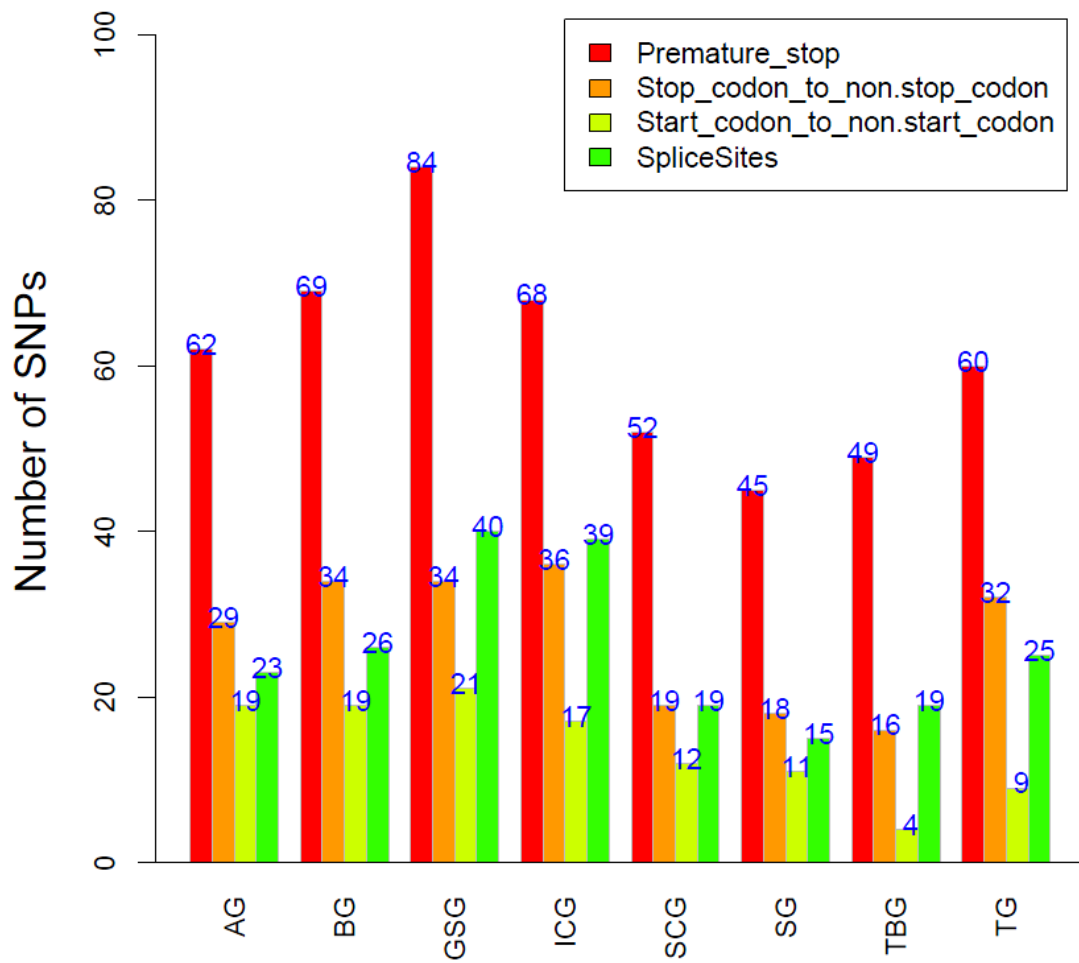

**Supplementary Fig. S3** The number of SNPs with large effects (premature stop, stop codon to nonstop codon, start codon to nonstart codon, and splicing sites) in each goat breed. Angora (AG), Boer (BG), Guizhou Small (GSG), Inner Mongolia Cashmere (ICG), Shaanbei Cashmere (SCG), Saanen (SG), Taihang Black (TBG), Tibetan (TG).

**Supplementary Table S1.** Pooled samples information for resequencing data from goats. Goat DNA pools represent eight separate breeds respectively. The number of individuals from each breed (n) and the number of males and females, the average sequence and assembly coverage per

| Breed                   | No. of samples | Sequence coverage (x) | Phenotype/Feature        |
|-------------------------|----------------|-----------------------|--------------------------|
| Taihang Black           | (M=10, F=11)   | 9.35                  | Meat, black coated       |
| Tibetan goat            | (F=25)         | 13.95                 | Highland adaption        |
| Inner Mongolia Cashmere | (M=8, F=20)    | 9.67                  | Fiber (cashmere)         |
| Shaanbei Cashmere       | (M=9, F=20)    | 9.13                  | Fiber (cashmere)         |
| Angora                  | (M=10, F=10)   | 10.65                 | Fiber (mohair)           |
| Saanen                  | (M=6, F=15)    | 10.86                 | Dairy                    |
| Boer                    | (M=7, F=15)    | 13.95                 | Meat, higher body weight |
| Guizhou Small           | (M=3, F=18)    | 10.00                 | Meat, lower body weight  |

pool are indicated.

**Supplementary Table S2.** The number of candidate regions and genes identified by ZH<sub>p</sub> and di in different breeds.

| Breed                   | ZH <sub>p</sub> | di  | Overlapped regions | Overlapped genes |
|-------------------------|-----------------|-----|--------------------|------------------|
| Taihang Black           | 48              | 54  | 6                  | 6                |
| Guizhou Small           | 49              | 56  | 4                  | 4                |
| Inner Mongolia Cashmere | 40              | 37  | 5                  | 5                |
| Tibetan goat            | 49              | 53  | 7                  | 6                |
| Total                   | 182             | 200 | 22                 | 21               |
